# Supplementary material for: An Influenza A Vaccine Based on the Extracellular Domain of Matrix 2 Protein Protects BALB/C Mice Against H1N1 and H3N2
Source: MDPI journal article supplement (doi:10.3390/vaccines7030091), 2019-08-19
Supplement: s1 [file s1]

## *Supplementary Material*

**Table 1: Sickness scores allocation**

| Point | Symptoms                  |
|-------|---------------------------|
| 0     | Healthy                   |
| 1     | Ruffled fur               |
| 1     | Hunched back posture      |
| 1     | Reduced activity          |
| 2     | Severely reduced activity |
